# Supplementary material for: Fluorescent magnetic ionic liquids with multiple responses to temperature, humidity and organic vapors
Source: Royal Society of Chemistry journal article supplement (doi:10.1039/d1tc01902c), 2021-01-01
Supplement: d1tc01902c1.pdf [file d1tc01902c1.pdf]

**Fluorescent magnetic ionic liquids with multi-responses to  
temperature, humidity and organic vapors**

Zhaohui Huang, Mengjiao Yi, Yue Xu, Ping Qi, Yihan Liu, Aixin Song\*, Jingcheng  
Hao

*Key Laboratory of Colloids and Interface Chemistry (Ministry of Education),  
Shandong University, Jinan 250100, China*

\* Corresponding author:

songaixin@sdu.edu.cn; Phone: 0531-88363532; Fax: 0531-88564750

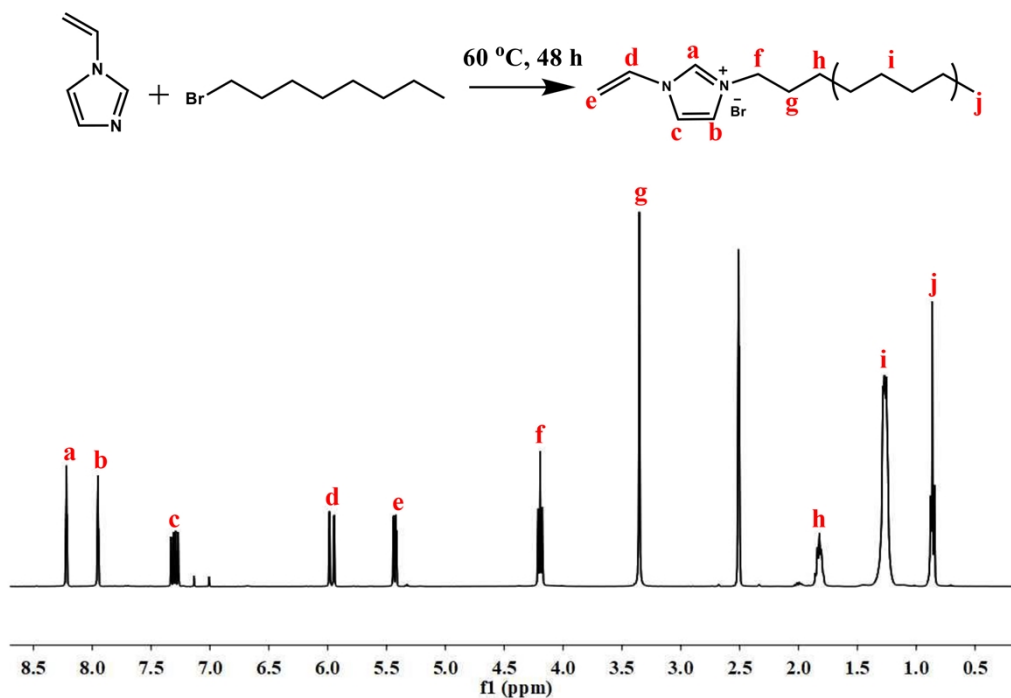

**Fig. S1**  $^1\text{H}$  NMR spectrum of  $[\text{C}_8\text{VIM}]\text{Br}$  ( $\text{DMSO-}d_6$ ,  $\delta$ , ppm): 9.52 (1H), 8.21 (1H), 7.95 (1H), 7.29 (1H), 5.96 (1H), 5.43 (1H), 4.19 (2H), 1.81 (2H), 1.26 (10H), 0.86 (3H).

**Table S1.** Elemental analysis results of C, H and N of  $[\text{C}_4\text{VIM}]\text{Mn}_1$ ,  $[\text{C}_8\text{VIM}]\text{Mn}_2$  and  $[\text{C}_{12}\text{VIM}]\text{Mn}_3$ .

|                                        | C          |       | H          |       | N          |       |
|----------------------------------------|------------|-------|------------|-------|------------|-------|
|                                        | Calculated | Found | Calculated | Found | Calculated | Found |
| $[\text{C}_4\text{VIM}]\text{Mn}_1$    | 30.2%      | 29.4% | 4.20%      | 4.38% | 7.84%      | 7.94% |
| $[\text{C}_8\text{VIM}]\text{Mn}_2$    | 37.8%      | 36.6% | 5.81%      | 5.64% | 6.78%      | 6.71% |
| $[\text{C}_{12}\text{VIM}]\text{Mn}_3$ | 43.5%      | 43.2% | 7.03%      | 6.87% | 5.97%      | 5.94% |

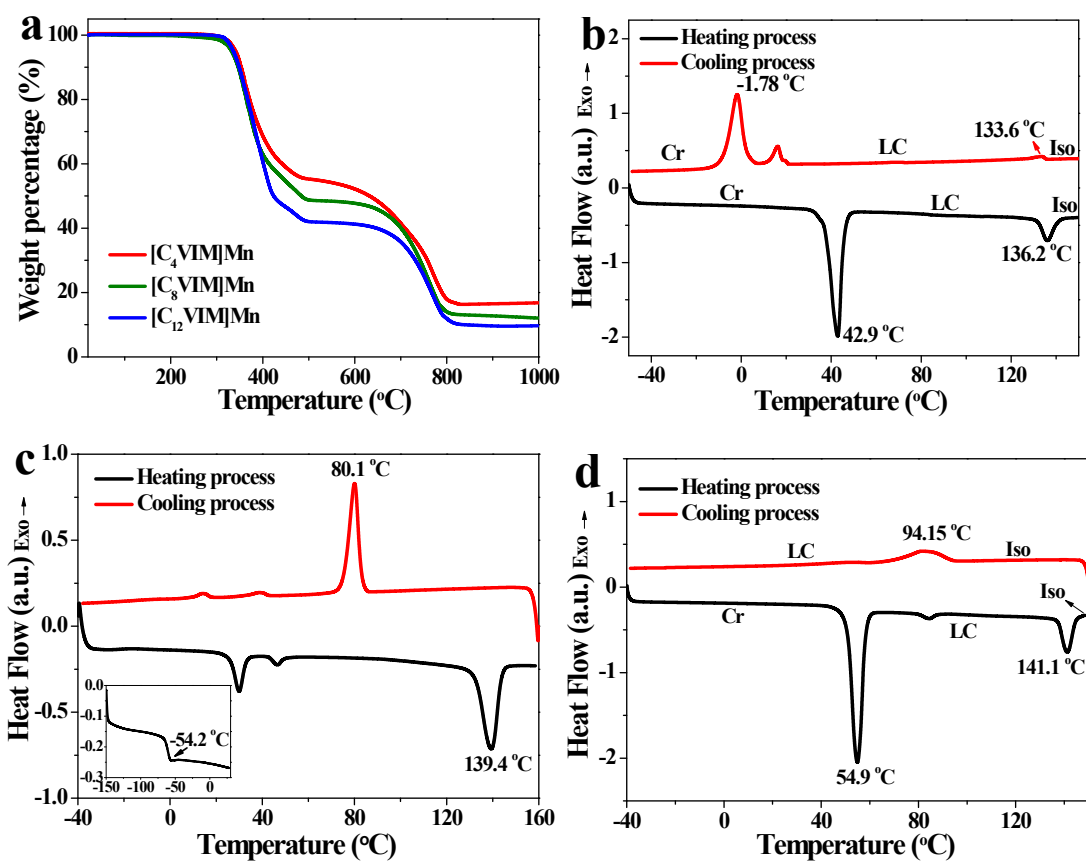

**Fig. S2** (a) TGA results of  $[C_4VIM]Mn_1$ ,  $[C_8VIM]Mn_2$  and  $[C_{12}VIM]Mn_3$ ; DSC results of  $[C_4VIM]Mn_1$  (b),  $[C_8VIM]Mn_2$  (c) and  $[C_{12}VIM]Mn_3$  (d).

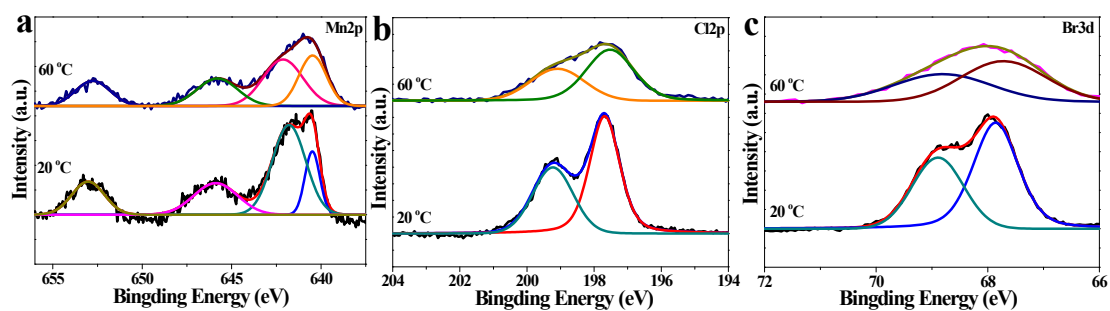

**Fig. S3** XPS spectra of Mn2p (a), Cl2p (b) and Br3d (c) of  $[C_{12}VIM]Mn_3$  at different temperatures.

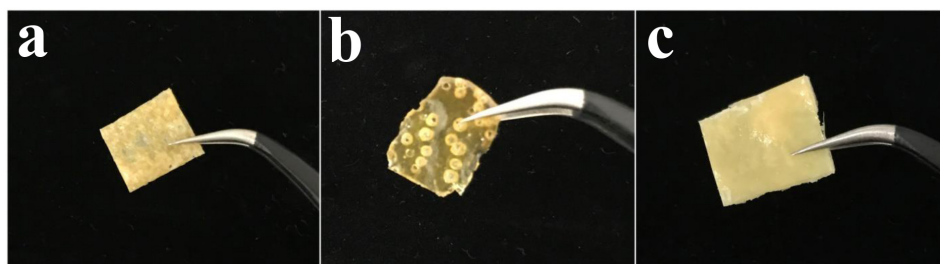

**Fig. S4** Poly(ionic liquid) films of  $[\text{C}_4\text{VIM}]\text{Mn}_1$  (a),  $[\text{C}_8\text{VIM}]\text{Mn}_2$  (b) and  $[\text{C}_{12}\text{VIM}]\text{Mn}_3$  (c).

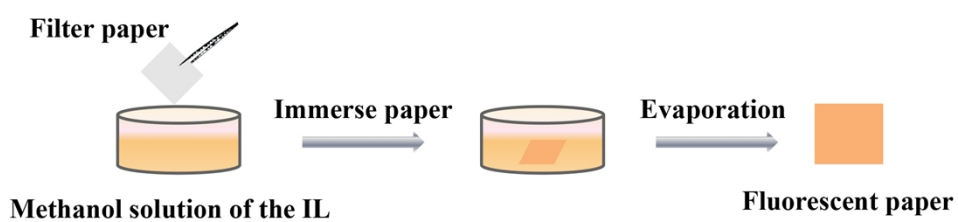

**Fig. S5** Preparation process of the fluorescent papers.

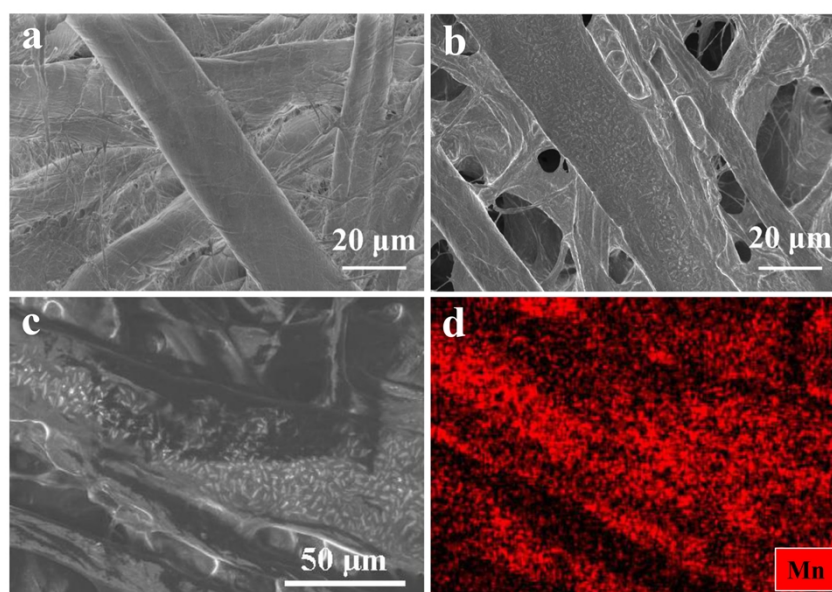

**Fig. S6** SEM images of the filter papers without (a) and with (b)  $[\text{C}_4\text{VIM}]\text{Mn}_1$ ; (c) the magnified image from (b), which was used for EDS-mapping detection of Mn element (d).

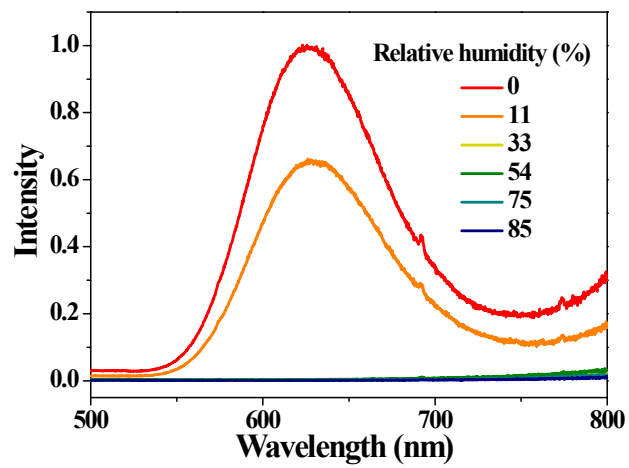

**Fig. S7** Emission spectra of the fluorescent papers loaded with  $[C_8VIM]Mn_2$  at various RH.
